# Supplementary material
Source: PubMed Central journal article supplement (PMC11388583)

**a.**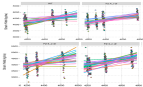**b.**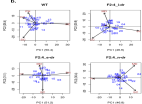

Supplement: PBI-16-1836-s003.pdf [file PBI-16-1836-s003.pdf]
