# Supplementary material
Source: PubMed Central journal article supplement (PMC11388583)

a.

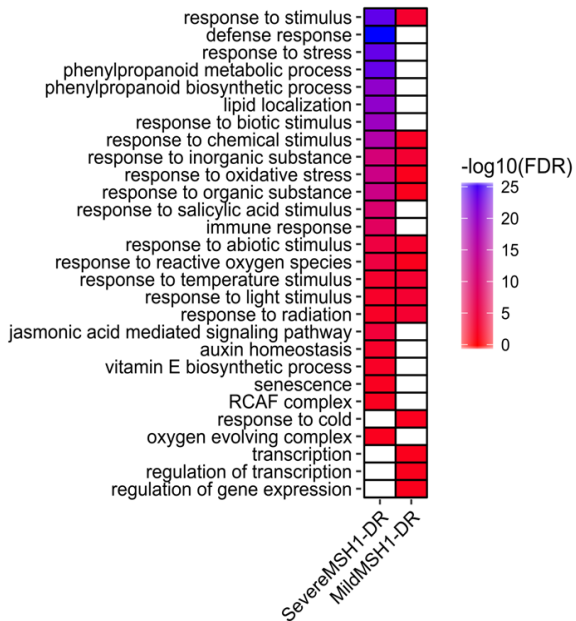

b.

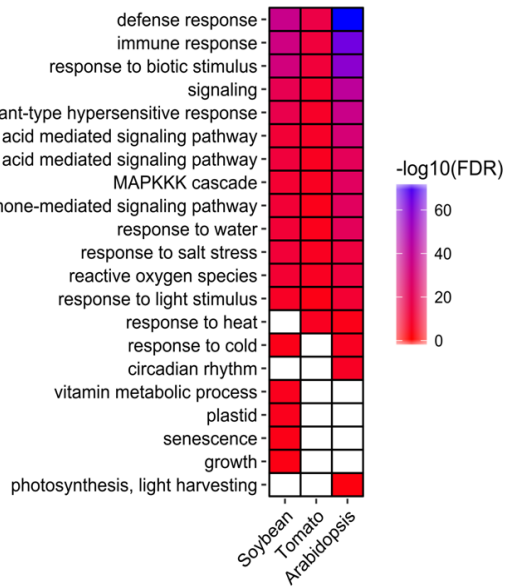

Supplement: PBI-16-1836-s016.pdf [file PBI-16-1836-s016.pdf]
