# Supplementary material
Source: PubMed Central journal article supplement (PMC11388583)

a.

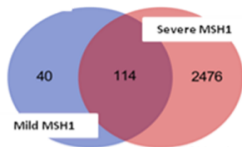

b.

|             | Up-regulated | Down-regulated |
|-------------|--------------|----------------|
| Severe MSH1 | 1656         | 933            |
| Mild MSH1   | 145          | 9              |

c.

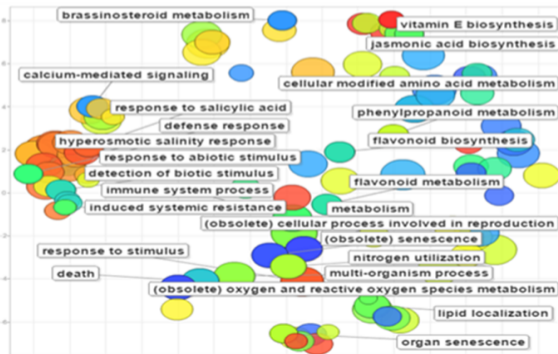

d.

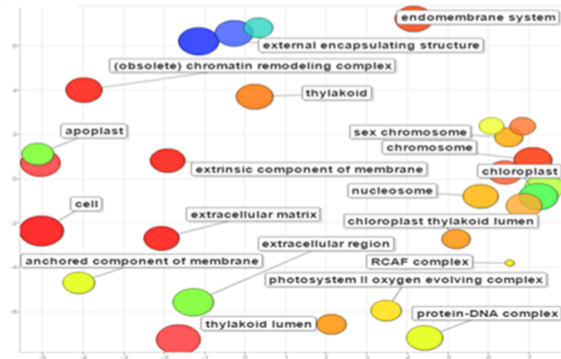

Supplement: PBI-16-1836-s017.pdf [file PBI-16-1836-s017.pdf]
