# Supplementary material
Source: PubMed Central journal article supplement (PMC11388583)

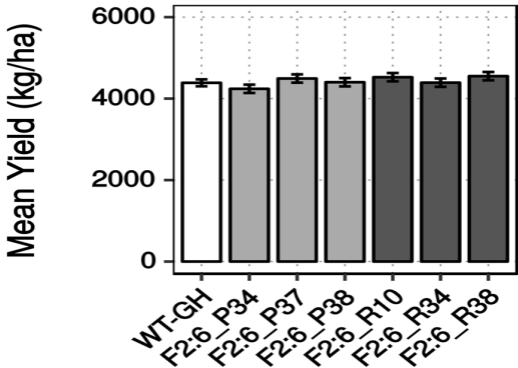

Supplement: PBI-16-1836-s019.pdf [file PBI-16-1836-s019.pdf]
